# Supplementary material
Source: PubMed Central journal article supplement (PMC6446424)
Supplement: supplementary_material.pdf [file supplementary_material.pdf]

## Supplement

**Supplementary Table 1: Gray matter volume (GMV) alterations in cortex and cerebellum of migraineurs.**

| Region                                                                                          | Cluster size (number of voxel) | Coordinates of the peak voxel(x, y, z) |     |     | T-value of the peak voxel |
|-------------------------------------------------------------------------------------------------|--------------------------------|----------------------------------------|-----|-----|---------------------------|
| <i>GMV decrease in migraineurs - Cortex</i>                                                     |                                |                                        |     |     |                           |
| B Precentral G                                                                                  | 4564                           | -8                                     | -26 | 68  | 5.27                      |
| L Precentral G                                                                                  | 144                            | -20                                    | -20 | 58  | 3.98                      |
| R Precentral G                                                                                  | 105                            | 20                                     | -20 | 54  | 3.71                      |
| L Supramarginal G                                                                               | 34                             | -40                                    | -46 | 22  | 3.50                      |
| R Postcentral G                                                                                 | 42                             | 68                                     | -12 | 14  | 3.33                      |
| L Angular G                                                                                     | 54                             | -36                                    | -56 | 20  | 3.33                      |
| <i>GMV decrease in migraineurs - Cerebellum and Brainstem</i>                                   |                                |                                        |     |     |                           |
| n.s.                                                                                            |                                |                                        |     |     |                           |
| <i>GMV increase in migraineurs - Cortex</i>                                                     |                                |                                        |     |     |                           |
| R Superior Temporal G                                                                           | 1951                           | 58                                     | -42 | 14  | 4.51                      |
| R Middle Temporal G                                                                             | 774                            | 56                                     | -28 | -8  | 3.91                      |
| R Occipital Pole                                                                                | 471                            | 10                                     | -98 | 0   | 3.76                      |
| L Pallidum                                                                                      | 58                             | -12                                    | -2  | -10 | 3.50                      |
| L Angular G                                                                                     | 49                             | -58                                    | -68 | 24  | 3.49                      |
| R Middle Temporal G                                                                             | 72                             | 66                                     | -20 | -18 | 3.36                      |
| R Inferior Occipital G                                                                          | 21                             | 36                                     | -86 | -12 | 3.30                      |
| <i>GMV increase in migraineurs - Cerebellum and Brainstem</i>                                   |                                |                                        |     |     |                           |
| R VIIb, R VIIIa                                                                                 | 39                             | 42                                     | -49 | -55 | 4.03                      |
| R Crus I, R VI                                                                                  | 22                             | 45                                     | -41 | -33 | 3.81                      |
| R VIIb                                                                                          | 20                             | 42                                     | -62 | -58 | 3.68                      |
| R Crus II, R VIIb                                                                               | 40                             | 43                                     | -59 | -49 | 3.44                      |
| <i>GMV increase with headache frequency - Cerebellum and Brainstem</i>                          |                                |                                        |     |     |                           |
| n.s.                                                                                            |                                |                                        |     |     |                           |
| <i>GMV decrease with headache frequency - Cerebellum and Brainstem</i>                          |                                |                                        |     |     |                           |
| R VI                                                                                            | 23                             | 40                                     | -50 | -24 | 3.88                      |
| <i>GMV increase with years suffering - Cerebellum and Brainstem</i>                             |                                |                                        |     |     |                           |
| L Rostral Pons                                                                                  | 26                             | -8                                     | -36 | -30 | 3.62                      |
| <i>GMV decrease with years suffering - Cerebellum and Brainstem</i>                             |                                |                                        |     |     |                           |
| R V                                                                                             | 20                             | 15                                     | -50 | -11 | 3.68                      |
| L = left, R = right, B = bilateral, n.s. = not significant, G = Gyrus, GMV = Gray Matter Volume |                                |                                        |     |     |                           |

**Supplementary Table 2: Main effect of trigeminal nociception in brainstem and cerebellum.**

| Region(s)                                                                                                                                                                                                                                                                                                         | Cluster size (number of voxel) | Coordinates of the peak voxel(x, y, z) |     |     | T-value of the peak voxel |
|-------------------------------------------------------------------------------------------------------------------------------------------------------------------------------------------------------------------------------------------------------------------------------------------------------------------|--------------------------------|----------------------------------------|-----|-----|---------------------------|
| <i>Cerebellum</i> *: Vermis VIIIa, Vermis Crus I, Left VIIIa, L VIIb, Vermis VIIIb, L V, L I-IV, L VI, Vermis Crus II, L Crus II, Vermis VIIb, L Crus I, Vermis VI, R V, R VI, R VIIIa, R VIIb, R I-IV, L VIIIb, R Crus I<br><i>Brainstem</i> : bilateral PAG, L rostral Pons, Nucleus Cuneiformis, Nucleus Ruber | 9129                           | -12                                    | -74 | -35 | 11.87                     |
| <i>Brainstem</i> : L sTN                                                                                                                                                                                                                                                                                          | 25                             | -2                                     | -42 | -61 | 6.85                      |

L = left, R = right, \* cerebellar regions with more than 10% of their volume activated

**Supplementary Table 3: Regions with increased BOLD response for migraineurs following trigeminal painful stimulation in the left nostril.**

| Region   | Cluster size (number of voxel) | Coordinates of the peak voxel(x, y, z) |     |     | T-value of the peak voxel |
|----------|--------------------------------|----------------------------------------|-----|-----|---------------------------|
| R PAG    | 15                             | 12                                     | -10 | -13 | 3.97                      |
| L Crus I | 20                             | -44                                    | -56 | -41 | 3.44                      |

L = left, R = right, PAG = Periaqueductal gray

**Supplementary Table 4: Decreased functional connectivity with left cerebellar area Crus I in migraineurs.**

| Region                   | Cluster size (number of voxel) | Coordinates of the peak voxel(x, y, z) |     |     | T-value of the peak voxel |
|--------------------------|--------------------------------|----------------------------------------|-----|-----|---------------------------|
| <i>Cortical areas</i>    |                                |                                        |     |     |                           |
| L Thalamus               | 60                             | -22                                    | -30 | 0   | 3.95                      |
| R Fusiformis G           | 72                             | 38                                     | -44 | -24 | 3.86                      |
| R Occipital Fusiformis G | 70                             | 38                                     | -82 | -14 | 3.58                      |
| L Occipital Fusiformis G | 10                             | -42                                    | -74 | -18 | 3.37                      |
| <i>Brainstem areas</i>   |                                |                                        |     |     |                           |
| n.s.                     |                                |                                        |     |     |                           |

L = left, R = right, G = Gyrus

**Supplementary Table 5: Regions with activity - following trigeminal painful stimulation in the left nostril - comodulating with the acuteness and/or severity of the migraine.**

| Region                                                                                                         | Cluster size<br>(number of voxel) | Coordinates of the<br>peak voxel(x, y, z) |     |     | F-value of the<br>peak voxel<br>(F <sub>4,46</sub> ) |
|----------------------------------------------------------------------------------------------------------------|-----------------------------------|-------------------------------------------|-----|-----|------------------------------------------------------|
| <i>ANOVA migraine phase</i>                                                                                    |                                   |                                           |     |     |                                                      |
| Vermis VIIIb, Vermis VIIIa, L VI, L VIIIa, L VIIb, L Crus I, L Crus II, L V*                                   | 2600                              | -18                                       | -58 | -29 | 32.51                                                |
| R VIIb, R VIIIa R Crus II                                                                                      | 91                                | 14                                        | -68 | -51 | 19.53                                                |
| R VI, R Crus I, R V, Vermis VI, R Crus II                                                                      | 367                               | 30                                        | -54 | -33 | 18.55                                                |
| L PAG                                                                                                          | 82                                | -8                                        | -26 | -13 | 16.47                                                |
| R PAG                                                                                                          | 62                                | 8                                         | -20 | -5  | 16.14                                                |
| R V, R I-V                                                                                                     | 37                                | 10                                        | -58 | -5  | 15.81                                                |
| Region                                                                                                         | Cluster size<br>(number of voxel) | Coordinates of the<br>peak voxel(x, y, z) |     |     | T-value of the<br>peak voxel                         |
| <i>post-hoc t-test: inter-ictal&lt;ictal</i>                                                                   |                                   |                                           |     |     |                                                      |
| n.s.                                                                                                           |                                   |                                           |     |     |                                                      |
| <i>post-hoc t-test: inter-ictal&gt;ictal</i>                                                                   |                                   |                                           |     |     |                                                      |
| R VIIIa                                                                                                        | 2                                 | 24                                        | -68 | -51 | 3.45                                                 |
| R VIIb                                                                                                         | 4                                 | 14                                        | -66 | -51 | 3.44                                                 |
| <i>post-hoc t-test: post-ictal&lt;ictal</i>                                                                    |                                   |                                           |     |     |                                                      |
| L IX                                                                                                           | 2                                 | -2                                        | -50 | -59 | 3.34                                                 |
| <i>post-hoc t-test: post-ictal&gt;ictal</i>                                                                    |                                   |                                           |     |     |                                                      |
| n.s.                                                                                                           |                                   |                                           |     |     |                                                      |
| <i>Increase with attack frequency</i>                                                                          |                                   |                                           |     |     |                                                      |
| L PAG                                                                                                          | 4                                 | -18                                       | -20 | -11 | 3.81                                                 |
| <i>Decrease with attack frequency</i>                                                                          |                                   |                                           |     |     |                                                      |
| R PAG                                                                                                          | 3                                 | 20                                        | -18 | -11 | 4.39                                                 |
| R VI                                                                                                           | 6                                 | 22                                        | -72 | -17 | 4.21                                                 |
| R Crus II                                                                                                      | 2                                 | 44                                        | -76 | -47 | 3.82                                                 |
| L = left, R = right, n.s. = not significant, * cerebellar regions with more than 10% of their volume activated |                                   |                                           |     |     |                                                      |
